# Supplementary material for: N doped carbon coated V2O5nanobelt arrays growing on carbon cloth toward enhanced performance cathodes for lithium ion batteries
Source: Royal Society of Chemistry journal article supplement (doi:10.1039/c7ra13633a), 2018-01-01
Supplement: c7ra13633a1.pdf [file c7ra13633a1.pdf]

## Electronic Supplementary information (ESI)

### **N doped carbon coated V<sub>2</sub>O<sub>5</sub> nanobelt arrays growing on carbon cloth toward enhanced performance cathode for lithium ion batteries**

Lijun Wu,<sup>a</sup> Yu Zhang,<sup>a</sup> Bingjiang Li,<sup>c</sup> Pengxiang Wang,<sup>a</sup> Lishuang Fan,<sup>b</sup> Naiqing Zhang<sup>\*ab</sup>  
and Kening Sun<sup>\*b</sup>

<sup>a</sup>State Key Laboratory of Urban Water Resource and Environment, Harbin Institute of  
Technology, Harbin, 150090, PR China

<sup>b</sup>Academy of Fundamental and Interdisciplinary Sciences, Harbin Institute of  
Technology, Harbin, 150090, PR China.

E-mail: sunkeninghit@163.com, znqmww@163.com,

\* Corresponding author. Tel.: +86-451-86412153; Fax: +86-451-86412153

## **Experimental Section**

### **Materials**

The carbon cloth was purchased from Tianjin Kermel Chemical reagent Co. Ltd. (Tianjin, China). All other reagents were analytically pure, and used without further purification.

### **Preparation of V<sub>2</sub>O<sub>5</sub> nanobelt arrays**

The experimental details were as follows. Clean carbon cloth 3×5 cm in size was used as the substrate. 0.5 mmol of V<sub>2</sub>O<sub>5</sub> powder (Alfa Aesar) was dissolved in 35 mL of deionized water under magnetical stirring for 0.5 h in air, and 3 mL of 35% H<sub>2</sub>O<sub>2</sub> (Alfa Aesar) was added under continuously stirring for 10 min. After that, 5 mg NH<sub>4</sub>H<sub>2</sub>PO<sub>4</sub> (Alfa Aesar) was dissolved into the above solution. The resulting solution was transferred into a 50 mL Teflon-lined stainless steel autoclave. The autoclave was heated to 180 °C for 5 h inside a conventional oven. Subsequently, the sample was washed with distilled water and ethanol and then dried at 60 °C. All the as-prepared samples were annealed at 400 °C for 2h in flowing argon at a ramping rate of 5 °C min<sup>-1</sup>. The weights of the V<sub>2</sub>O<sub>5</sub> nanobelt arrays were measured by a micro-balance (Mettler Toledo, New Classic MS) with an accuracy of 0.01 mg. The weights of all the V<sub>2</sub>O<sub>5</sub> arrays were around 2 mg.

### **Preparation of N doped carbon coated V<sub>2</sub>O<sub>5</sub> nanobelt arrays**

50 mg dopamine was dissolved in 100 mL of deionized water contained 10 mM tromethamine. After that, V<sub>2</sub>O<sub>5</sub> array was immersed into the above solution for 5h. Subsequently, the samples were annealed at 450 °C for 1 h in flowing argon at a ramping rate of 5 °C min<sup>-1</sup>.

### **Characterization**

The resulting sample was characterized by field emission scanning electron microscopy (FESEM, Hitachi Su8010), X-ray diffraction (XRD, Rigaku D/Max-γB), transmission electron microscopy (TEM, FTI, Tecnai F20, 300 kV), X-ray photoelectron spectroscopy (XPS) measurements were carried out

using a spectrometer with Mg K $\alpha$  radiation (ESCALAB 250, Thermo Fisher Scientific Co.). In addition, nitrogen physisorption experiments were measured on a Micromeritics ASAP 2020 system, and specific surface areas and pore size distribution of samples were determined by the Brunauer-Emmett-Teller (BET).

V<sub>2</sub>O<sub>5</sub> nanobelt arrays growing on carbon cloth was used directly as the working electrode without binders and conductivity agents, 1 M LiPF<sub>6</sub> in ethylene carbonate (EC), dimethyl carbonate (DMC) (1:1 in volume) was used as the electrolyte, and two porous polypropylene membranes as a separator. The cells were assembled in an argon-filled glove box with high-purity argon gas (99.9995% purity). Electrochemical measurements were carried out by using coin (CR2025) testing cells, which were performed on a NEWARE battery program-control test system between 2.01 and 4.0 V at room temperature. Cyclic voltammogram (CV) tests were recorded on the electrochemical workstation (CHI, 660d) between 4.0 V and 2.01 V at a scan rate of 0.2 mV s<sup>-1</sup>. Electrochemical impedance spectroscopy (EIS) measurements were performed on a PAR-STAT 2273 electrochemical systems in the frequency range mainly from 100 kHz to 10 mHz with an AC signal amplitude of 5 mV.

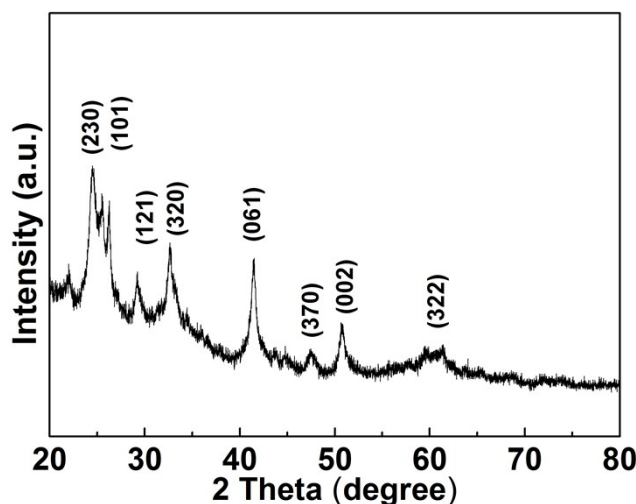

**Figure S1** The XRD pattern of the prepared precursor sample scraped from the as-prepared V<sub>3</sub>O<sub>7</sub>·H<sub>2</sub>O growing on carbon cloth.

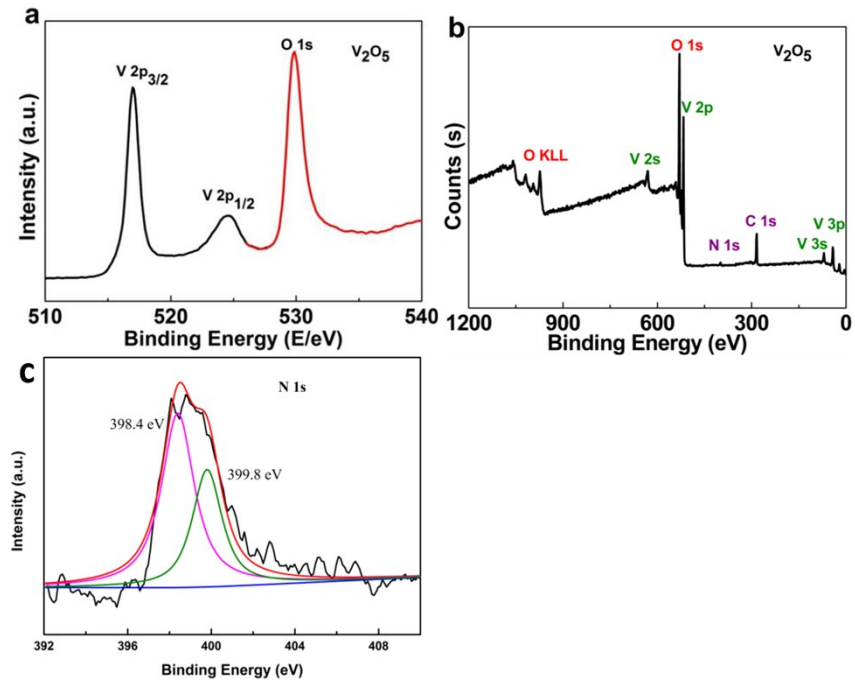

**Figure S2** The corresponding XPS spectra of  $V_2O_5$ : (a,c) the O 1s, V 2p and N 1s bands, (b) XPS wide-scan survey.

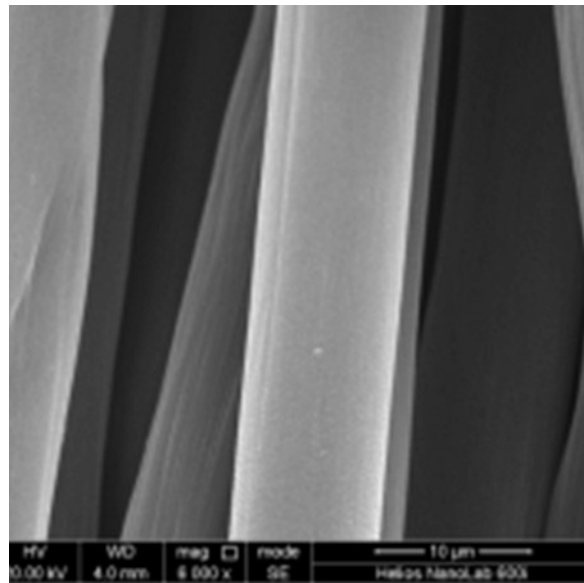

**Figure S3** SEM image of carbon cloth.

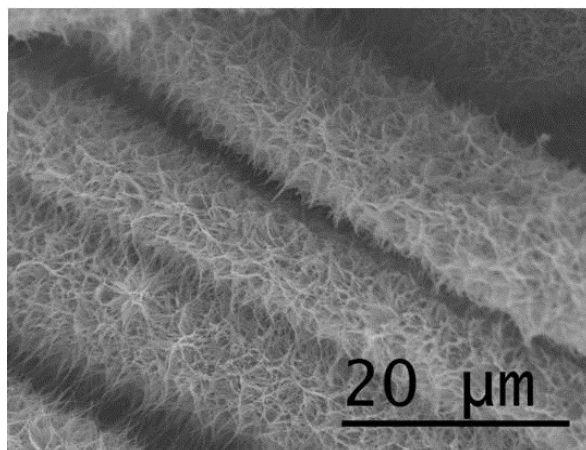

**Figure S4** SEM image of sample  $V_2O_5@N-C$ .

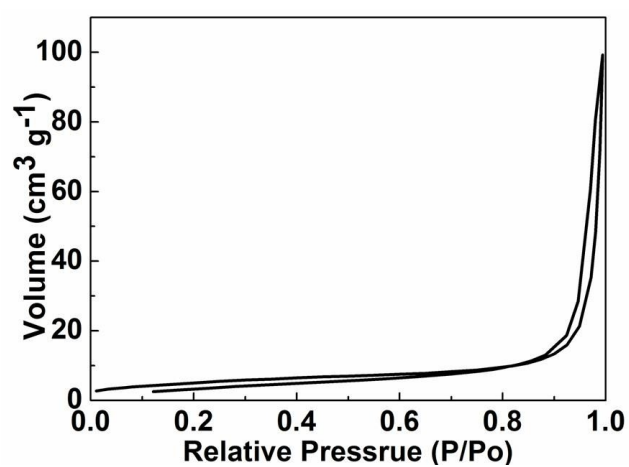

**Figure S5**  $N_2$  adsorption/desorption isotherm of the  $V_2O_5@N-C$  nanobelt arrays growing on the carbon cloth.

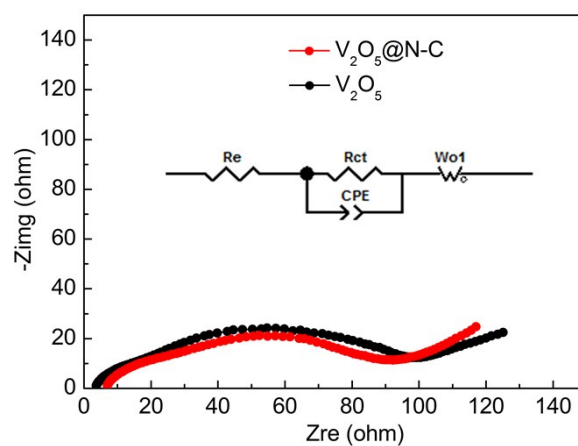

**Figure S6** Nyquist plots of electrode materials.
